# Supplementary material
Source: publisher figshare collection journal article supplement (https://tandf.figshare.com/ndownloader/files/3705865)
Supplement: Supplementary file 1 [file 3705865]

Photochemical Addition of Silirane to Endohedral Metallofullerene:

Electronic Properties of Carbosilylated Sc3N@*Ih*-C80

Masahiro Kako, *,1 Takeshi Sugiura,1 and Takeshi Akasaka,2,3,4,5

1 Department of Engineering Science, The University of Electro-Communications, Chofu 182-8585, Japan

2 Life Science Center of Tsukuba Advanced Research Alliance, University of Tsukuba, Ibaraki 305-8577, Japan

3 Department of Chemistry, Tokyo Gakugei University, Tokyo 184-8501, Japan

4 Foundation for Advancement of International Science, Ibaraki 305-0821, Japan

5 College of Materials Science and Engineering, Huazhong University of Science and Technology (HUST), Wuhan 430074, China

Email: [kako@e-one.uec.ac.jp](mailto:kako@e-one.uec.ac.jp)

**Supplemental Materials**


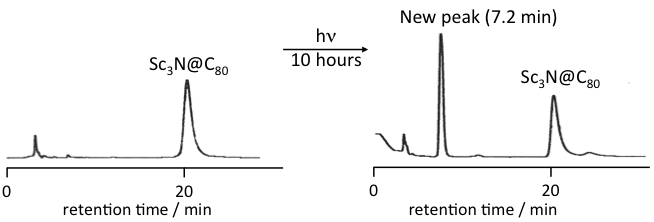


**Figure S 1.** HPLC separation of Sc3N@*Ih*-C80 and **2a**-**c**. Conditions: BPM column (φ 10 × 250 mm); eluent, toluene; flow rate, 3.0 mL/min; detection wavelength, 330 nm; temperature, room temperature.

**
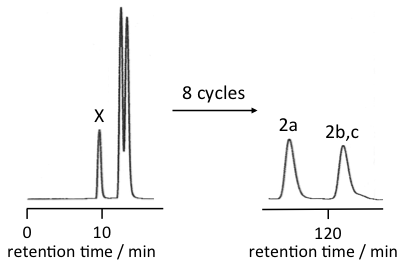
**

**Figure S 2.** (a) HPLC separation of **2a**, **2b**, and **2c**. Conditions: BP column (φ 20 × 250 mm); eluent, toluene; flow rate, 6.5 mL/min; detection wavelength, 330 nm; temperature, room temperature.


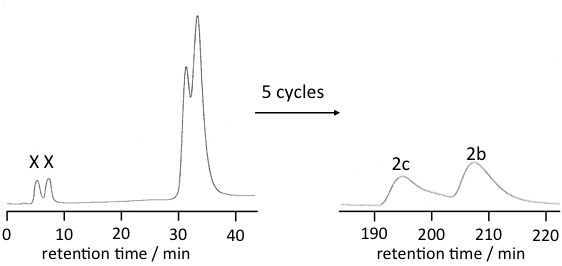


**Figure S 3.** HPLC separation of **2b** and **2c**. Conditions: 5PBB column (φ 10 × 250 mm); eluent, toluene; flow rate, 3.0 mL/min; detection wavelength, 282 nm; temperature, room temperature.


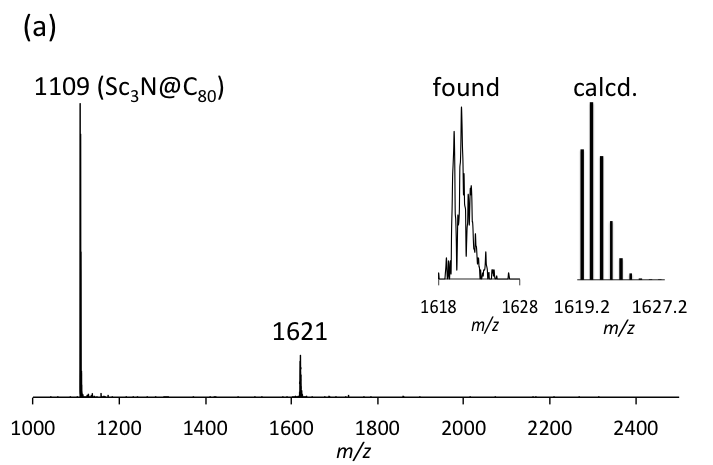

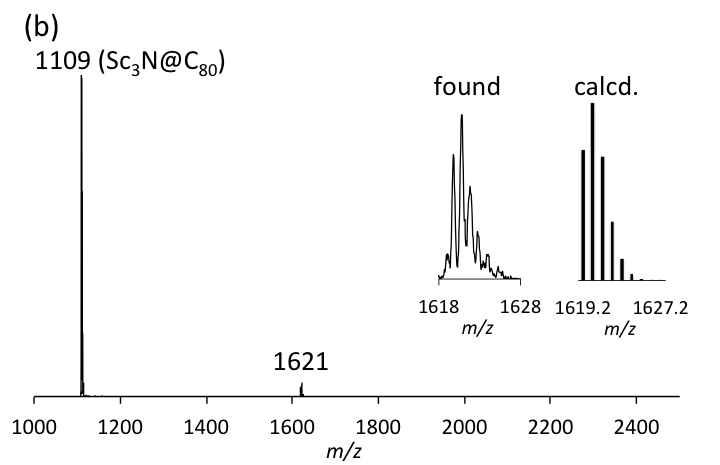

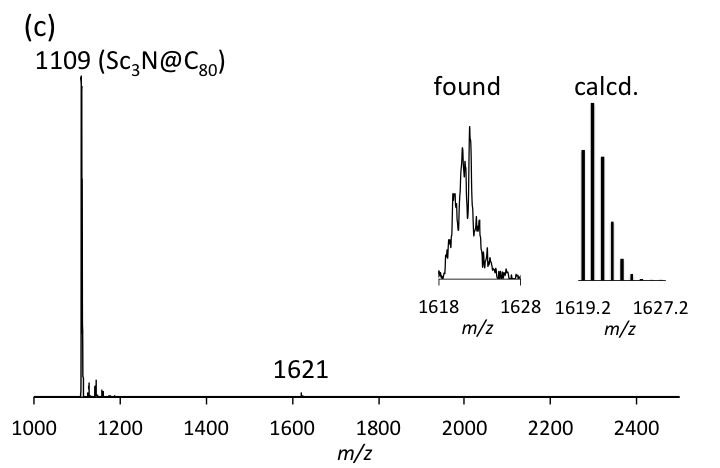


**Figure S 4.** Negative-mode MALDI-TOF mass spectra of (a) **2a**, (b) **2b**, and (c) **2c**. Matrix: 1,1,4,4-tetraphenyl-1,3-butadiene.

**
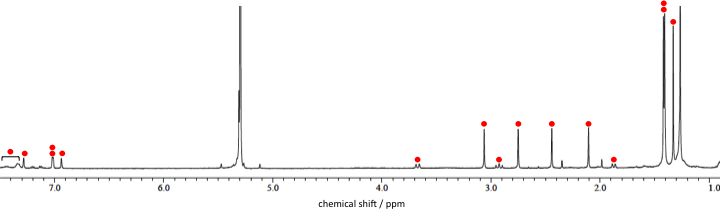
**

(a)

(b)

**
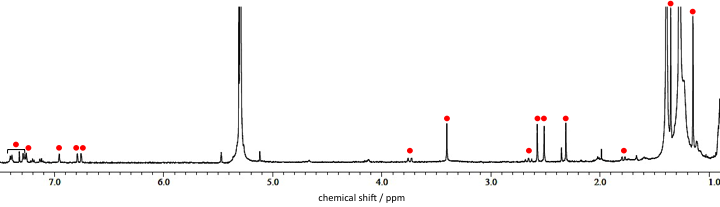
**

(c)

**
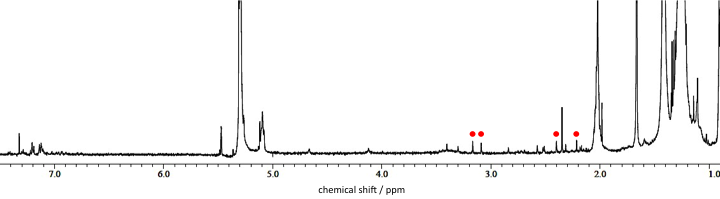
**

**Figure S 5.** 500 MHz 1H NMR spectra of (a) **2a**, (b) **2b**, and (c) **2c** in CS2/CD2Cl2 (1:1).

**Figure S 6.** 125 MHz 13C NMR spectra of **2a** in CS2/CDCl3 (1:1).


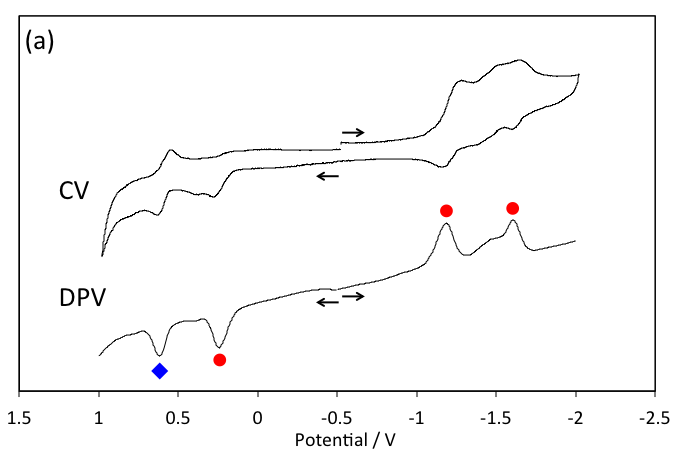

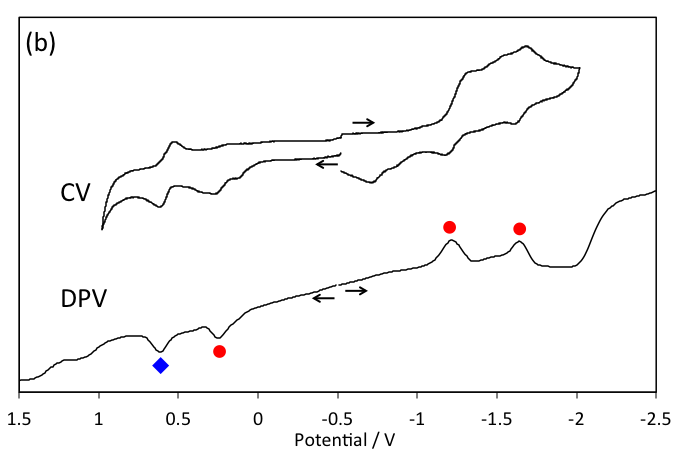


**Figure S 7.** Cyclic voltammograms (CV) and differential pulse voltammograms (DPV) of (a) **2a** and (b) **2b** in ODCB containing 0.1 M (*n*-Bu)4NPF6. Peaks of Sc3N@*Ih*-C80, and the carbosilylated derivatives are marked in blue and red, respectively. Conditions: working electrode, a glassy carbon electrode; counter-electrode, Pt wire; reference electrode, SCE; CV scan rates, 20 mV/s; DPV scan rate, 50 mV/s.

**Figure S 8.** Conformations of the disilirane addends in **4**-I (left) and **4**-II (right).2a The methyl groups of **4** are not shown for clarity.

**Table S 1.** Optimized cartesian coordinates of **2**-I, **2**-II, **2**-III, **2**-IV, and **2**-V.

**2**-I

| C | 2.938777 | 1.399269 | -3.526141 |
| --- | --- | --- | --- |
| C | 3.382390 | 0.058320 | -3.747062 |
| C | 2.471110 | -1.045019 | -3.713549 |
| C | 1.088234 | -0.760135 | -3.525890 |
| C | 4.717439 | -0.065218 | -3.206224 |
| C | 2.969954 | -2.292133 | -3.220627 |
| C | 4.307859 | -2.395259 | -2.680950 |
| C | 5.234105 | -1.300806 | -2.688676 |
| C | 2.592567 | 0.719052 | 4.233048 |
| C | 2.101274 | 1.966140 | 3.730984 |
| C | 0.781428 | 2.065143 | 3.175256 |
| C | -0.064758 | 0.931109 | 3.099907 |
| C | 0.371590 | -0.274972 | 3.702400 |
| C | 1.688980 | -0.389557 | 4.261047 |
| C | 0.794163 | 3.042731 | 2.114614 |
| C | -0.911722 | 0.821847 | 1.946946 |
| C | -0.967781 | 1.831944 | 0.941790 |
| C | -0.100570 | 2.963483 | 0.988191 |
| C | 0.121863 | 2.670352 | -1.444257 |
| C | -0.770524 | 1.545139 | -1.472260 |
| C | 0.641752 | 0.582552 | -3.281026 |
| C | 1.563401 | 1.656930 | -3.235855 |
| C | 1.280630 | 2.693086 | -2.296427 |
| C | -0.490294 | 0.536407 | -2.391758 |
| C | 5.801735 | -1.868737 | 2.005540 |
| C | 5.570166 | -0.841464 | 2.959532 |
| C | 4.438831 | -0.906041 | 3.840497 |
| C | 3.524594 | -2.000939 | 3.773378 |
| C | 3.818887 | -3.074574 | 2.878394 |
| C | 4.955514 | -3.016394 | 2.008558 |
| C | 3.977221 | 0.438562 | 4.064216 |
| C | 2.146157 | -1.727971 | 4.034640 |
| C | 4.624318 | -3.699816 | 0.781904 |
| C | 6.352536 | -1.471701 | 0.736022 |
| C | 6.085263 | -2.171450 | -0.493355 |
| C | 5.124544 | -3.253519 | -0.476375 |
| C | -0.739247 | -0.873857 | -2.074082 |
| C | 0.249228 | -1.652882 | -2.778966 |
| C | 3.982263 | 2.124710 | -2.848643 |
| C | 5.077535 | 1.218657 | -2.642640 |
| C | -0.008154 | -1.546939 | 3.144376 |
| C | 1.100730 | -2.451122 | 3.348646 |
| C | 4.831963 | 1.337742 | 3.335848 |
| C | 5.814477 | 0.548608 | 2.647247 |
| C | 0.772348 | -2.847668 | -2.229008 |
| C | 2.132316 | -3.195629 | -2.497401 |
| C | 1.386590 | -3.506816 | 2.416344 |
| C | 2.310755 | 3.453299 | -1.648510 |
| C | 3.699544 | 3.130791 | -1.877417 |
| C | 4.320488 | 2.537575 | 2.754903 |
| C | -0.901433 | -1.651398 | 2.019761 |
| C | 4.271571 | -3.373127 | -1.613992 |
| C | 2.930740 | -3.873237 | -1.506944 |
| C | 2.407211 | -4.229836 | -0.228047 |
| C | 3.274523 | -4.185385 | 0.895919 |
| C | 2.770331 | -3.791353 | 2.192215 |
| C | -1.261356 | -1.254174 | -0.838940 |
| C | -1.367790 | -0.431939 | 1.446201 |
| C | -0.781864 | -2.490850 | -0.286786 |
| C | 0.237873 | -3.243797 | -0.965832 |
| C | 1.009042 | -3.956099 | 0.013023 |
| C | 0.448052 | -3.688372 | 1.321224 |
| C | -0.702364 | -2.793567 | 1.134707 |
| C | 6.200808 | -1.224775 | -1.601514 |
| C | 6.497776 | 0.078410 | -1.001876 |
| C | 6.600396 | -0.092277 | 0.425717 |
| C | 6.298371 | 0.950310 | 1.373564 |
| C | 5.931969 | 1.313676 | -1.501760 |
| C | 0.397421 | 3.494611 | -0.275854 |
| C | 1.790343 | 3.950319 | -0.392616 |
| C | 2.695692 | 3.945002 | 0.742806 |
| C | 2.950595 | 2.860190 | 3.003313 |
| C | 2.150022 | 3.531318 | 2.006035 |
| C | 4.078622 | 3.649242 | 0.523259 |
| C | 4.585476 | 3.279064 | -0.778045 |
| C | 5.690153 | 2.377124 | -0.581162 |
| C | 5.871024 | 2.201231 | 0.839115 |
| C | 4.883901 | 2.985428 | 1.520344 |
| N | 2.469108 | -0.169826 | 0.165773 |
| Sc | 1.190665 | -1.553758 | 0.910573 |
| Sc | 1.734597 | 1.721567 | 0.181972 |
| Sc | 4.254715 | -0.613341 | -0.628578 |
| C | -1.996719 | -0.267829 | 0.065445 |
| C | -1.715871 | 1.321856 | -0.294049 |
| Si | -3.961940 | -0.533611 | -0.344447 |
| C | -3.122417 | 2.005178 | -0.524389 |
| H | -3.593605 | 2.032937 | 0.468785 |
| C | -3.944031 | 1.046957 | -1.413595 |
| H | -3.457164 | 0.923313 | -2.384044 |
| H | -4.942921 | 1.456864 | -1.588609 |
| C | -3.073318 | 3.446260 | -1.007067 |
| C | -3.156132 | 4.496989 | -0.082153 |
| C | -2.956577 | 3.790066 | -2.358456 |
| C | -3.104891 | 5.827590 | -0.489881 |
| H | -3.264721 | 4.269721 | 0.976292 |
| C | -2.906220 | 5.125064 | -2.765839 |
| H | -2.904957 | 3.012256 | -3.114909 |
| C | -2.974180 | 6.178884 | -1.844125 |
| H | -3.172680 | 6.604093 | 0.267214 |
| H | -2.814910 | 5.332614 | -3.826328 |
| C | -2.919904 | 7.660587 | -2.256755 |
| C | -4.224720 | 8.366987 | -1.817196 |
| H | -4.198128 | 9.426548 | -2.100126 |
| H | -5.098614 | 7.909415 | -2.295058 |
| H | -4.371105 | 8.315483 | -0.733132 |
| C | -2.767111 | 7.839598 | -3.779253 |
| H | -1.843331 | 7.383343 | -4.152985 |
| H | -3.610522 | 7.405435 | -4.328404 |
| H | -2.730173 | 8.907341 | -4.023289 |
| C | -1.712700 | 8.341492 | -1.568003 |
| H | -1.780953 | 8.284977 | -0.476537 |
| H | -0.771329 | 7.867402 | -1.868960 |
| H | -1.663872 | 9.401806 | -1.844663 |
| C | -4.148079 | -2.277824 | -1.102347 |
| C | -4.270058 | -3.383923 | -0.222232 |
| C | -4.179037 | -2.546800 | -2.498824 |
| C | -4.402356 | -4.685415 | -0.727730 |
| C | -4.322348 | -3.859961 | -2.955673 |
| C | -4.432967 | -4.959243 | -2.095199 |
| H | -4.483906 | -5.496270 | -0.011757 |
| H | -4.343665 | -4.021472 | -4.030184 |
| C | -5.429256 | -0.230563 | 0.873308 |
| C | -5.364830 | 0.133364 | 2.244791 |
| C | -6.727356 | -0.333047 | 0.296687 |
| C | -6.534334 | 0.376358 | 2.971953 |
| C | -7.871907 | -0.073462 | 1.066251 |
| C | -7.812770 | 0.282927 | 2.412452 |
| H | -6.429635 | 0.652768 | 4.017813 |
| H | -8.834188 | -0.162457 | 0.573714 |
| C | -4.293539 | -3.240924 | 1.287966 |
| H | -3.542376 | -2.538788 | 1.661089 |
| H | -5.268548 | -2.888984 | 1.643730 |
| H | -4.090978 | -4.204459 | 1.766335 |
| C | -4.061474 | -1.469272 | -3.557957 |
| H | -4.813250 | -0.681936 | -3.439029 |
| H | -3.076450 | -0.989292 | -3.540531 |
| H | -4.194646 | -1.898725 | -4.555564 |
| C | -6.985124 | -0.744410 | -1.142045 |
| H | -8.021731 | -0.526955 | -1.417471 |
| H | -6.346702 | -0.220134 | -1.858974 |
| H | -6.819773 | -1.816396 | -1.293711 |
| C | -4.064151 | 0.282765 | 2.999334 |
| H | -3.462082 | -0.630531 | 2.973394 |
| H | -3.444637 | 1.090462 | 2.595830 |
| H | -4.251900 | 0.518427 | 4.051399 |
| C | -4.583619 | -6.379464 | -2.667211 |
| C | -3.366325 | -6.705373 | -3.565624 |
| H | -3.276194 | -6.005662 | -4.402937 |
| H | -2.433310 | -6.662267 | -2.991921 |
| H | -3.461999 | -7.714881 | -3.983845 |
| C | -5.878745 | -6.455500 | -3.511160 |
| H | -5.998522 | -7.460180 | -3.934677 |
| H | -6.760052 | -6.238591 | -2.896556 |
| H | -5.866748 | -5.741990 | -4.341857 |
| C | -4.664963 | -7.451410 | -1.563680 |
| H | -3.762870 | -7.465322 | -0.941349 |
| H | -5.530655 | -7.299203 | -0.909030 |
| H | -4.766774 | -8.442628 | -2.019767 |
| C | -9.060002 | 0.567080 | 3.267021 |
| C | -10.367375 | 0.414769 | 2.466090 |
| H | -10.490716 | -0.601786 | 2.075392 |
| H | -11.224211 | 0.624602 | 3.116318 |
| H | -10.414206 | 1.113458 | 1.622915 |
| C | -8.992589 | 2.014858 | 3.809266 |
| H | -8.101749 | 2.178928 | 4.424467 |
| H | -8.970535 | 2.740493 | 2.988104 |
| H | -9.871135 | 2.229850 | 4.429853 |
| C | -9.104560 | -0.423047 | 4.455437 |
| H | -9.162452 | -1.458645 | 4.101174 |
| H | -8.217817 | -0.336449 | 5.092008 |
| H | -9.984845 | -0.227404 | 5.079806 |

**2**-II

| C | -2.708765 | 2.803025 | 3.029191 |
| --- | --- | --- | --- |
| C | -3.104760 | 1.678014 | 3.818243 |
| C | -2.172754 | 0.653186 | 4.178433 |
| C | -0.814261 | 0.825966 | 3.788417 |
| C | -4.470986 | 1.350925 | 3.477421 |
| C | -2.674839 | -0.682720 | 4.282999 |
| C | -4.043559 | -0.991780 | 3.933322 |
| C | -4.990852 | 0.013768 | 3.553861 |
| C | -2.884818 | -1.028586 | -3.756984 |
| C | -2.388445 | 0.311100 | -3.850402 |
| C | -1.035656 | 0.622558 | -3.483701 |
| C | -0.159642 | -0.385450 | -3.010539 |
| C | -0.610438 | -1.728449 | -3.025289 |
| C | -1.959947 | -2.055915 | -3.390114 |
| C | -0.997186 | 1.952873 | -2.925158 |
| C | 0.769071 | -0.013273 | -1.980914 |
| C | 0.864632 | 1.321538 | -1.484493 |
| C | -0.023360 | 2.342137 | -1.935621 |
| C | -0.067050 | 3.089082 | 0.410439 |
| C | 0.849869 | 2.067359 | 0.835223 |
| C | -0.416090 | 1.943453 | 2.977974 |
| C | -1.362533 | 2.909787 | 2.559914 |
| C | -1.168063 | 3.464437 | 1.259412 |
| C | 0.649034 | 1.522815 | 2.104450 |
| C | -5.870090 | -2.439040 | -0.430792 |
| C | -5.728967 | -1.900731 | -1.738351 |
| C | -4.661449 | -2.332587 | -2.594790 |
| C | -3.719435 | -3.307844 | -2.147452 |
| C | -3.925701 | -3.911438 | -0.869096 |
| C | -5.000178 | -3.491457 | -0.019807 |
| C | -4.247706 | -1.204017 | -3.386946 |
| C | -2.368869 | -3.177091 | -2.597410 |
| C | -4.568689 | -3.608702 | 1.352207 |
| C | -6.337605 | -1.546500 | 0.596063 |
| C | -5.960663 | -1.673132 | 1.978887 |
| C | -4.986704 | -2.677311 | 2.346581 |
| C | 0.900201 | 0.106204 | 2.377841 |
| C | -0.011705 | -0.302562 | 3.415321 |
| C | -3.812439 | 3.188155 | 2.189993 |
| C | -4.899439 | 2.285844 | 2.459215 |
| C | -0.166271 | -2.654126 | -2.016842 |
| C | -1.262116 | -3.557907 | -1.750324 |
| C | -5.069466 | -0.077705 | -3.033567 |
| C | -5.983725 | -0.504498 | -2.011367 |
| C | -0.540316 | -1.615049 | 3.452316 |
| C | -1.868409 | -1.811241 | 3.941246 |
| C | -1.455599 | -4.135840 | -0.448850 |
| C | -2.259458 | 3.892333 | 0.432320 |
| C | -3.621216 | 3.703084 | 0.873457 |
| C | -4.548169 | 1.251627 | -3.040495 |
| C | 0.798921 | -2.288522 | -1.016731 |
| C | -4.058684 | -2.325806 | 3.370192 |
| C | -2.717549 | -2.833419 | 3.381559 |
| C | -2.274962 | -3.687557 | 2.326885 |
| C | -3.218443 | -4.103629 | 1.350311 |
| C | -2.813909 | -4.285480 | -0.026487 |
| C | 1.367144 | -0.755380 | 1.387487 |
| C | 1.278136 | -0.946875 | -1.037925 |
| C | 0.868666 | -2.104764 | 1.429864 |
| C | -0.084410 | -2.502516 | 2.430976 |
| C | -0.902264 | -3.553066 | 1.893798 |
| C | -0.439196 | -3.855897 | 0.553817 |
| C | 0.692295 | -2.963234 | 0.268073 |
| C | -6.032029 | -0.357311 | 2.605741 |
| C | -6.416079 | 0.584938 | 1.548382 |
| C | -6.604208 | -0.161889 | 0.327780 |
| C | -6.388991 | 0.391366 | -0.986338 |
| C | -5.838145 | 1.909423 | 1.448445 |
| C | -0.445169 | 3.354183 | -0.972077 |
| C | -1.839862 | 3.818553 | -0.950582 |
| C | -2.821485 | 3.349743 | -1.911305 |
| C | -3.206216 | 1.432075 | -3.498118 |
| C | -2.354404 | 2.449211 | -2.927784 |
| C | -4.180476 | 3.186249 | -1.492303 |
| C | -4.584386 | 3.389530 | -0.121326 |
| C | -5.677028 | 2.492111 | 0.154424 |
| C | -5.952769 | 1.747307 | -1.049584 |
| C | -5.035220 | 2.174049 | -2.063973 |
| N | -2.471331 | -0.155313 | 0.276242 |
| Sc | -1.245879 | -1.759647 | 0.112673 |
| Sc | -1.742510 | 1.544568 | -0.558370 |
| Sc | -4.190559 | -0.139012 | 1.308850 |
| C | 2.003062 | -0.232031 | 0.113607 |
| C | 1.714661 | 1.364983 | -0.206591 |
| Si | 3.971943 | -0.483062 | -0.282052 |
| C | 4.155223 | -2.205273 | -1.091308 |
| C | 4.164945 | -2.432797 | -2.491486 |
| C | 4.290280 | -3.340707 | -0.243828 |
| C | 4.295452 | -3.734783 | -2.996371 |
| C | 4.410037 | -4.620396 | -0.793725 |
| C | 4.415292 | -4.855801 | -2.172891 |
| H | 4.298636 | -3.856348 | -4.074097 |
| H | 4.502953 | -5.458595 | -0.107978 |
| C | 5.441271 | -0.223032 | 0.942814 |
| C | 6.743686 | -0.311737 | 0.364464 |
| C | 5.373288 | 0.102852 | 2.318251 |
| C | 7.879367 | -0.077201 | 1.146341 |
| C | 6.541181 | 0.326748 | 3.062777 |
| C | 7.816940 | 0.243967 | 2.506129 |
| H | 8.848628 | -0.153946 | 0.660180 |
| H | 6.425136 | 0.574648 | 4.112295 |
| C | 4.044659 | -1.323927 | -3.518445 |
| H | 3.070273 | -0.824791 | -3.472423 |
| H | 4.813212 | -0.553909 | -3.392222 |
| H | 4.152131 | -1.727561 | -4.529770 |
| C | 4.339668 | -3.244963 | 1.269644 |
| H | 5.311763 | -2.879821 | 1.618869 |
| H | 3.578173 | -2.574184 | 1.678592 |
| H | 4.170577 | -4.228626 | 1.719214 |
| C | 4.550432 | -6.288937 | -2.715891 |
| C | 3.372460 | -7.147930 | -2.196292 |
| H | 3.458755 | -8.176211 | -2.568214 |
| H | 3.349234 | -7.189744 | -1.102383 |
| H | 2.412330 | -6.743123 | -2.536650 |
| C | 4.538079 | -6.338422 | -4.255766 |
| H | 3.603308 | -5.943776 | -4.670009 |
| H | 5.370840 | -5.772965 | -4.689473 |
| H | 4.634912 | -7.377320 | -4.590719 |
| C | 5.885069 | -6.899587 | -2.224779 |
| H | 6.739621 | -6.315415 | -2.585364 |
| H | 5.940367 | -6.933496 | -1.131752 |
| H | 5.993999 | -7.925703 | -2.596850 |
| C | 4.066962 | 0.218595 | 3.066184 |
| H | 3.406187 | 0.975817 | 2.634101 |
| H | 3.512951 | -0.725369 | 3.071887 |
| H | 4.238172 | 0.499202 | 4.110028 |
| C | 7.001472 | -0.679518 | -1.085867 |
| H | 6.828102 | -1.744711 | -1.272301 |
| H | 6.367843 | -0.127169 | -1.786258 |
| H | 8.040184 | -0.461178 | -1.352684 |
| C | 9.106882 | 0.486127 | 3.308761 |
| C | 9.979581 | -0.791498 | 3.273450 |
| H | 10.908915 | -0.633411 | 3.834197 |
| H | 9.450972 | -1.639575 | 3.723728 |
| H | 10.250664 | -1.071664 | 2.250194 |
| C | 8.823970 | 0.834647 | 4.782511 |
| H | 8.228834 | 1.749973 | 4.878091 |
| H | 8.294214 | 0.026042 | 5.298862 |
| H | 9.769811 | 0.999662 | 5.310798 |
| C | 9.892519 | 1.660450 | 2.677587 |
| H | 10.161713 | 1.457946 | 1.635710 |
| H | 9.301280 | 2.583175 | 2.696917 |
| H | 10.821044 | 1.839883 | 3.233423 |
| C | 3.052523 | 3.511197 | -0.883447 |
| C | 3.083645 | 4.552852 | 0.050297 |
| C | 2.974957 | 3.866335 | -2.238169 |
| C | 3.020574 | 5.891230 | -0.343573 |
| H | 3.161016 | 4.317633 | 1.109771 |
| C | 2.911296 | 5.201308 | -2.629443 |
| H | 2.967368 | 3.096060 | -3.003779 |
| C | 2.927599 | 6.250990 | -1.694559 |
| H | 3.050015 | 6.655231 | 0.425625 |
| H | 2.851284 | 5.424171 | -3.691360 |
| C | 2.852863 | 7.712159 | -2.171686 |
| C | 4.057555 | 8.016463 | -3.094303 |
| H | 4.073920 | 7.363796 | -3.973526 |
| H | 4.012938 | 9.053180 | -3.450027 |
| H | 5.004896 | 7.881163 | -2.559812 |
| C | 1.537878 | 7.929052 | -2.958595 |
| H | 1.471704 | 7.272062 | -3.832098 |
| H | 0.665496 | 7.731644 | -2.324938 |
| H | 1.472797 | 8.964619 | -3.314564 |
| C | 2.881254 | 8.712339 | -1.000587 |
| H | 2.035138 | 8.566500 | -0.319366 |
| H | 3.807086 | 8.633852 | -0.419266 |
| H | 2.820848 | 9.735572 | -1.388042 |
| C | 3.970291 | 1.133903 | -1.294594 |
| H | 4.973759 | 1.551236 | -1.417848 |
| H | 3.523637 | 1.042053 | -2.287012 |
| C | 3.115433 | 2.067213 | -0.410152 |
| H | 3.566385 | 2.093963 | 0.592444 |

**2**-III

| C | 2.892532 | 1.306005 | -3.582175 |
| --- | --- | --- | --- |
| C | 3.341439 | -0.037120 | -3.802248 |
| C | 2.430478 | -1.137537 | -3.733398 |
| C | 1.049083 | -0.844371 | -3.518406 |
| C | 4.688058 | -0.148288 | -3.303923 |
| C | 2.926481 | -2.380549 | -3.225225 |
| C | 4.260436 | -2.479598 | -2.703652 |
| C | 5.141938 | -1.355945 | -2.693489 |
| C | 2.646457 | 0.777558 | 4.215363 |
| C | 2.151103 | 2.019944 | 3.708766 |
| C | 0.823864 | 2.114098 | 3.158783 |
| C | -0.031911 | 0.983411 | 3.122470 |
| C | 0.414749 | -0.214304 | 3.739148 |
| C | 1.739947 | -0.322558 | 4.282797 |
| C | 0.841159 | 3.054586 | 2.074436 |
| C | -0.942749 | 0.862585 | 1.998904 |
| C | -0.955921 | 1.825016 | 0.953721 |
| C | -0.013357 | 2.901267 | 0.948760 |
| C | 0.123410 | 2.619941 | -1.496986 |
| C | -0.768282 | 1.510164 | -1.472847 |
| C | 0.602441 | 0.500042 | -3.303407 |
| C | 1.523521 | 1.583459 | -3.287475 |
| C | 1.248538 | 2.648948 | -2.389211 |
| C | -0.508442 | 0.469646 | -2.385080 |
| C | 5.843829 | -1.856983 | 1.967920 |
| C | 5.607652 | -0.817445 | 2.916240 |
| C | 4.483437 | -0.855233 | 3.818954 |
| C | 3.556266 | -1.936605 | 3.781177 |
| C | 3.837326 | -3.004315 | 2.855160 |
| C | 4.997286 | -3.028863 | 2.000034 |
| C | 4.034330 | 0.490080 | 4.030826 |
| C | 2.189495 | -1.670985 | 4.064719 |
| C | 4.672731 | -3.803687 | 0.799744 |
| C | 6.390176 | -1.492303 | 0.698300 |
| C | 6.021769 | -2.201234 | -0.511536 |
| C | 5.148718 | -3.338661 | -0.498017 |
| C | -0.777115 | -0.927492 | -2.057222 |
| C | 0.205852 | -1.724118 | -2.757631 |
| C | 3.949756 | 2.031340 | -2.925399 |
| C | 5.061825 | 1.121333 | -2.753641 |
| C | 0.033069 | -1.494746 | 3.208177 |
| C | 1.132615 | -2.398349 | 3.402741 |
| C | 4.879043 | 1.366738 | 3.261807 |
| C | 5.851347 | 0.558589 | 2.570255 |
| C | 0.721353 | -2.919116 | -2.187552 |
| C | 2.080390 | -3.264676 | -2.474006 |
| C | 1.403656 | -3.422820 | 2.456645 |
| C | 2.306946 | 3.387037 | -1.755233 |
| C | 3.688744 | 3.096136 | -2.004365 |
| C | 4.351391 | 2.552552 | 2.677251 |
| C | -0.821620 | -1.594053 | 2.070144 |
| C | 4.243900 | -3.419391 | -1.609979 |
| C | 2.882265 | -3.897176 | -1.469892 |
| C | 2.360949 | -4.241439 | -0.188047 |
| C | 3.273668 | -4.197035 | 0.932533 |
| C | 2.783238 | -3.728792 | 2.207222 |
| C | -1.335729 | -1.318153 | -0.813759 |
| C | -1.423446 | -0.403833 | 1.534778 |
| C | -0.796735 | -2.506581 | -0.249890 |
| C | 0.182960 | -3.319493 | -0.932277 |
| C | 0.977620 | -3.986456 | 0.056621 |
| C | 0.503806 | -3.586840 | 1.360954 |
| C | -0.590222 | -2.686475 | 1.176354 |
| C | 6.050634 | -1.251171 | -1.598614 |
| C | 6.441046 | 0.022830 | -1.062520 |
| C | 6.652824 | -0.125930 | 0.355490 |
| C | 6.325179 | 0.910329 | 1.277717 |
| C | 5.903967 | 1.223277 | -1.611694 |
| C | 0.468773 | 3.359723 | -0.313594 |
| C | 1.824319 | 3.810724 | -0.454107 |
| C | 2.719460 | 3.927316 | 0.662751 |
| C | 2.995554 | 2.888960 | 2.947703 |
| C | 2.189074 | 3.535507 | 1.933311 |
| C | 4.136782 | 3.728839 | 0.415690 |
| C | 4.624977 | 3.319174 | -0.913673 |
| C | 5.653306 | 2.319077 | -0.702420 |
| C | 5.831787 | 2.135922 | 0.713545 |
| C | 4.887986 | 2.971340 | 1.400688 |
| N | 2.476241 | -0.175977 | 0.229487 |
| C | -2.037231 | -0.286184 | 0.117477 |
| C | -1.718052 | 1.324190 | -0.278868 |
| Si | -4.013639 | -0.510921 | -0.317836 |
| C | -3.121437 | 2.012611 | -0.509479 |
| H | -3.582726 | 2.046668 | 0.488005 |
| C | -3.955358 | 1.062002 | -1.391218 |
| H | -3.472436 | 0.923708 | -2.361483 |
| H | -4.948939 | 1.485092 | -1.565897 |
| C | -3.050455 | 3.451529 | -0.993245 |
| C | -3.071578 | 4.501472 | -0.063917 |
| C | -2.968937 | 3.793872 | -2.347345 |
| C | -2.996398 | 5.830523 | -0.471859 |
| H | -3.147315 | 4.274795 | 0.997383 |
| C | -2.895320 | 5.127593 | -2.754559 |
| H | -2.962372 | 3.016521 | -3.106078 |
| C | -2.901781 | 6.180528 | -1.829495 |
| H | -3.015445 | 6.607213 | 0.287747 |
| H | -2.832542 | 5.334665 | -3.817150 |
| C | -2.815799 | 7.660878 | -2.241561 |
| C | -4.082873 | 8.406205 | -1.758609 |
| H | -4.031832 | 9.465752 | -2.038390 |
| H | -4.985367 | 7.978619 | -2.210511 |
| H | -4.196898 | 8.354248 | -0.670711 |
| C | -2.707119 | 7.838654 | -3.767960 |
| H | -1.810753 | 7.354758 | -4.172303 |
| H | -3.581209 | 7.432153 | -4.289643 |
| H | -2.644938 | 8.905264 | -4.011777 |
| C | -1.565653 | 8.301444 | -1.591560 |
| H | -1.601905 | 8.248473 | -0.498401 |
| H | -0.650730 | 7.795249 | -1.920252 |
| H | -1.489552 | 9.359173 | -1.871888 |
| C | -4.201294 | -2.254653 | -1.067424 |
| C | -4.306714 | -3.357289 | -0.180774 |
| C | -4.249263 | -2.527422 | -2.462319 |
| C | -4.450366 | -4.659654 | -0.679533 |
| C | -4.402750 | -3.841999 | -2.911897 |
| C | -4.504752 | -4.937482 | -2.045808 |
| H | -4.519898 | -5.468435 | 0.039944 |
| H | -4.438118 | -4.007704 | -3.985335 |
| C | -5.476481 | -0.189658 | 0.896966 |
| C | -5.416027 | 0.172153 | 2.269301 |
| C | -6.772104 | -0.279236 | 0.311544 |
| C | -6.588183 | 0.425714 | 2.988568 |
| C | -7.918401 | -0.008384 | 1.074147 |
| C | -7.863871 | 0.346210 | 2.421022 |
| H | -6.487194 | 0.699608 | 4.035378 |
| H | -8.878413 | -0.087519 | 0.575655 |
| C | -4.287591 | -3.205689 | 1.328391 |
| H | -3.491463 | -2.539907 | 1.676418 |
| H | -5.234287 | -2.804399 | 1.707119 |
| H | -4.120105 | -4.175064 | 1.808138 |
| C | -4.134429 | -1.455278 | -3.527653 |
| H | -4.874456 | -0.657889 | -3.403267 |
| H | -3.143017 | -0.987697 | -3.527423 |
| H | -4.286311 | -1.887683 | -4.521237 |
| C | -7.025516 | -0.687207 | -1.128835 |
| H | -8.060783 | -0.467514 | -1.407116 |
| H | -6.384918 | -0.161276 | -1.842763 |
| H | -6.861052 | -1.758942 | -1.282677 |
| C | -4.119384 | 0.307690 | 3.032659 |
| H | -3.521207 | -0.607740 | 3.001010 |
| H | -3.493220 | 1.115197 | 2.640092 |
| H | -4.312880 | 0.534588 | 4.085623 |
| C | -4.669469 | -6.358909 | -2.610655 |
| C | -3.465779 | -6.693044 | -3.524279 |
| H | -3.384668 | -5.997317 | -4.365854 |
| H | -2.524877 | -6.650845 | -2.963757 |
| H | -3.571226 | -7.703915 | -3.936777 |
| C | -5.976451 | -6.431972 | -3.436396 |
| H | -6.106274 | -7.437636 | -3.854501 |
| H | -6.848385 | -6.209180 | -2.810575 |
| H | -5.973041 | -5.721726 | -4.270001 |
| C | -4.740650 | -7.426419 | -1.502188 |
| H | -3.829484 | -7.443695 | -0.893415 |
| H | -5.595668 | -7.266683 | -0.835370 |
| H | -4.855115 | -8.418542 | -1.953205 |
| C | -9.113332 | 0.642467 | 3.268040 |
| C | -10.417415 | 0.502054 | 2.459643 |
| H | -10.548256 | -0.513584 | 2.068961 |
| H | -11.275860 | 0.720513 | 3.104851 |
| H | -10.452957 | 1.200688 | 1.615865 |
| C | -9.034806 | 2.089916 | 3.809725 |
| H | -8.145787 | 2.245741 | 4.429683 |
| H | -9.001224 | 2.814777 | 2.988261 |
| H | -9.914653 | 2.313774 | 4.425270 |
| C | -9.174113 | -0.346637 | 4.456567 |
| H | -9.239108 | -1.381870 | 4.102467 |
| H | -8.290934 | -0.267750 | 5.099053 |
| H | -10.056619 | -0.142708 | 5.075075 |
| Sc | 0.465456 | -0.224359 | 0.179833 |
| Sc | 3.333936 | 1.654271 | -0.054821 |
| Sc | 3.593819 | -1.849697 | 0.481814 |

**2**-IV

| C | -2.651469 | 2.909337 | 2.967035 |
| --- | --- | --- | --- |
| C | -3.077229 | 1.812321 | 3.784216 |
| C | -2.162693 | 0.781218 | 4.169776 |
| C | -0.800662 | 0.922159 | 3.763153 |
| C | -4.444531 | 1.507781 | 3.459203 |
| C | -2.681195 | -0.544112 | 4.306375 |
| C | -4.052104 | -0.842702 | 3.984460 |
| C | -4.938591 | 0.169361 | 3.507863 |
| C | -2.894455 | -1.075985 | -3.740273 |
| C | -2.379337 | 0.248370 | -3.879921 |
| C | -1.020818 | 0.550339 | -3.519590 |
| C | -0.153580 | -0.458886 | -3.027608 |
| C | -0.626857 | -1.796709 | -3.002897 |
| C | -1.983524 | -2.108962 | -3.362613 |
| C | -0.972870 | 1.885787 | -2.989733 |
| C | 0.821868 | -0.072696 | -2.028640 |
| C | 0.927387 | 1.269423 | -1.553619 |
| C | -0.048259 | 2.238281 | -1.969260 |
| C | -0.022637 | 3.085613 | 0.355255 |
| C | 0.916751 | 2.110474 | 0.790780 |
| C | -0.373970 | 2.018452 | 2.941466 |
| C | -1.303177 | 2.998768 | 2.496489 |
| C | -1.098597 | 3.539929 | 1.201329 |
| C | 0.697049 | 1.564653 | 2.082915 |
| C | -5.928427 | -2.341093 | -0.363859 |
| C | -5.758265 | -1.856148 | -1.688025 |
| C | -4.689650 | -2.320841 | -2.536835 |
| C | -3.751447 | -3.289100 | -2.080170 |
| C | -3.955984 | -3.827371 | -0.760102 |
| C | -5.027657 | -3.376376 | 0.083115 |
| C | -4.266590 | -1.225554 | -3.365229 |
| C | -2.407998 | -3.206641 | -2.541979 |
| C | -4.633635 | -3.552407 | 1.463894 |
| C | -6.434025 | -1.454966 | 0.634150 |
| C | -5.970452 | -1.539528 | 1.999034 |
| C | -5.037532 | -2.538058 | 2.418176 |
| C | 0.920022 | 0.153826 | 2.383859 |
| C | -0.001715 | -0.220331 | 3.432391 |
| C | -3.749241 | 3.283361 | 2.112770 |
| C | -4.865192 | 2.411025 | 2.420494 |
| C | -0.202012 | -2.711461 | -1.979898 |
| C | -1.307442 | -3.586193 | -1.689196 |
| C | -5.066408 | -0.081673 | -3.030608 |
| C | -5.994212 | -0.466819 | -1.996945 |
| C | -0.542381 | -1.532392 | 3.494274 |
| C | -1.880043 | -1.685355 | 3.975789 |
| C | -1.516299 | -4.071361 | -0.369392 |
| C | -2.194295 | 3.933428 | 0.360241 |
| C | -3.553751 | 3.815606 | 0.794689 |
| C | -4.508191 | 1.228057 | -3.069974 |
| C | 0.707929 | -2.307074 | -0.968305 |
| C | -4.093656 | -2.162981 | 3.425141 |
| C | -2.745507 | -2.694610 | 3.423329 |
| C | -2.307394 | -3.637687 | 2.435026 |
| C | -3.287973 | -4.133855 | 1.478936 |
| C | -2.874861 | -4.268685 | 0.082503 |
| C | 1.387470 | -0.767484 | 1.413812 |
| C | 1.278461 | -0.993516 | -1.043171 |
| C | 0.845056 | -2.084032 | 1.490292 |
| C | -0.089506 | -2.460020 | 2.519562 |
| C | -0.954465 | -3.478174 | 1.988086 |
| C | -0.542140 | -3.731559 | 0.621648 |
| C | 0.576673 | -2.900453 | 0.324745 |
| C | -5.911838 | -0.206569 | 2.537438 |
| C | -6.332266 | 0.703318 | 1.501330 |
| C | -6.658136 | -0.075700 | 0.327757 |
| C | -6.394414 | 0.436738 | -0.976161 |
| C | -5.824206 | 2.038734 | 1.420237 |
| C | -0.452965 | 3.227301 | -1.020422 |
| C | -1.789232 | 3.721720 | -1.014831 |
| C | -2.746360 | 3.298728 | -1.985585 |
| C | -3.179700 | 1.392615 | -3.548144 |
| C | -2.312063 | 2.409932 | -3.004087 |
| C | -4.116165 | 3.196658 | -1.545102 |
| C | -4.569959 | 3.534469 | -0.204968 |
| C | -5.697457 | 2.645447 | 0.106399 |
| C | -5.903598 | 1.793732 | -1.050648 |
| C | -4.955565 | 2.154652 | -2.065830 |
| N | -2.433887 | -0.109743 | 0.313882 |
| C | 2.032059 | -0.282423 | 0.107125 |
| C | 1.770754 | 1.361826 | -0.259159 |
| Si | 4.001786 | -0.555889 | -0.303701 |
| C | 4.126051 | -2.282536 | -1.109903 |
| C | 4.117761 | -2.507073 | -2.510682 |
| C | 4.217464 | -3.423963 | -0.263893 |
| C | 4.178095 | -3.813304 | -3.017463 |
| C | 4.268108 | -4.706459 | -0.816588 |
| C | 4.245107 | -4.939684 | -2.196199 |
| H | 4.167511 | -3.932901 | -4.095220 |
| H | 4.328415 | -5.549108 | -0.132947 |
| C | 5.471667 | -0.314923 | 0.921914 |
| C | 6.774962 | -0.407446 | 0.344383 |
| C | 5.401728 | 0.016238 | 2.295712 |
| C | 7.908637 | -0.163740 | 1.125891 |
| C | 6.568196 | 0.249308 | 3.039551 |
| C | 7.844034 | 0.169943 | 2.482854 |
| H | 8.878657 | -0.244209 | 0.642214 |
| H | 6.450895 | 0.500155 | 4.088187 |
| C | 4.053054 | -1.392839 | -3.536497 |
| H | 3.089585 | -0.871111 | -3.516513 |
| H | 4.836692 | -0.643401 | -3.385199 |
| H | 4.179098 | -1.796715 | -4.545591 |
| C | 4.287486 | -3.329061 | 1.248371 |
| H | 5.257965 | -2.949278 | 1.585392 |
| H | 3.518404 | -2.671452 | 1.665851 |
| H | 4.139093 | -4.315113 | 1.699520 |
| C | 4.295008 | -6.377165 | -2.742058 |
| C | 3.070632 | -7.165860 | -2.218261 |
| H | 3.089709 | -8.194160 | -2.599866 |
| H | 3.055439 | -7.215981 | -1.124557 |
| H | 2.134624 | -6.698767 | -2.545090 |
| C | 4.272250 | -6.422716 | -4.282141 |
| H | 3.363958 | -5.965814 | -4.691040 |
| H | 5.139061 | -5.913438 | -4.718838 |
| H | 4.298110 | -7.465291 | -4.618744 |
| C | 5.593643 | -7.066589 | -2.258958 |
| H | 6.479689 | -6.533601 | -2.622846 |
| H | 5.652352 | -7.106760 | -1.166310 |
| H | 5.639018 | -8.096426 | -2.633889 |
| C | 4.093327 | 0.126919 | 3.041045 |
| H | 3.443006 | 0.901079 | 2.623375 |
| H | 3.531356 | -0.812361 | 3.021835 |
| H | 4.262264 | 0.381794 | 4.091905 |
| C | 7.031537 | -0.780552 | -1.104716 |
| H | 6.696811 | -1.797285 | -1.332211 |
| H | 6.526118 | -0.112004 | -1.810283 |
| H | 8.101803 | -0.726073 | -1.325469 |
| C | 9.133114 | 0.425862 | 3.282826 |
| C | 10.020466 | -0.841566 | 3.244751 |
| H | 10.949112 | -0.672803 | 3.803489 |
| H | 9.502760 | -1.695945 | 3.695744 |
| H | 10.292575 | -1.117906 | 2.220732 |
| C | 8.849473 | 0.770450 | 4.757336 |
| H | 8.230675 | 1.669845 | 4.854105 |
| H | 8.344628 | -0.050824 | 5.278689 |
| H | 9.793633 | 0.962055 | 5.279619 |
| C | 9.903272 | 1.609631 | 2.650046 |
| H | 10.176458 | 1.408432 | 1.608946 |
| H | 9.299285 | 2.524137 | 2.666678 |
| H | 10.828481 | 1.803057 | 3.206722 |
| C | 3.150446 | 3.456124 | -0.930179 |
| C | 3.257328 | 4.502210 | -0.007628 |
| C | 3.011053 | 3.801683 | -2.282399 |
| C | 3.210898 | 5.838824 | -0.409571 |
| H | 3.379311 | 4.272541 | 1.048949 |
| C | 2.963089 | 5.134944 | -2.680821 |
| H | 2.936444 | 3.025405 | -3.037985 |
| C | 3.057067 | 6.190446 | -1.756806 |
| H | 3.298833 | 6.607156 | 0.350499 |
| H | 2.849829 | 5.352643 | -3.739276 |
| C | 2.992094 | 7.649658 | -2.241774 |
| C | 4.139793 | 7.911749 | -3.246103 |
| H | 4.076611 | 7.252777 | -4.118555 |
| H | 4.101406 | 8.946972 | -3.606840 |
| H | 5.116804 | 7.751711 | -2.775693 |
| C | 1.633497 | 7.897347 | -2.940533 |
| H | 1.495337 | 7.240681 | -3.805693 |
| H | 0.800281 | 7.721169 | -2.250639 |
| H | 1.570018 | 8.933761 | -3.294314 |
| C | 3.127556 | 8.657780 | -1.084580 |
| H | 2.333447 | 8.533544 | -0.339323 |
| H | 4.093432 | 8.566670 | -0.574483 |
| H | 3.056174 | 9.679098 | -1.475433 |
| C | 4.025582 | 1.057593 | -1.319795 |
| H | 5.038957 | 1.452339 | -1.437000 |
| H | 3.580518 | 0.973539 | -2.312838 |
| C | 3.191378 | 2.015335 | -0.447363 |
| H | 3.630197 | 2.038005 | 0.560562 |
| Sc | -0.462209 | 0.237405 | 0.147329 |
| Sc | -3.753708 | 1.449183 | 0.228876 |
| Sc | -3.032067 | -1.990779 | 0.832987 |

**2**-V

| C | -5.941725 | 2.135956 | 0.611104 |
| --- | --- | --- | --- |
| C | -6.329459 | 0.974022 | 1.357952 |
| C | -5.747171 | 0.675794 | 2.629667 |
| C | -4.836146 | 1.621722 | 3.179282 |
| C | -6.640685 | -0.076012 | 0.419872 |
| C | -5.566223 | -0.703138 | 2.959080 |
| C | -5.873762 | -1.743173 | 2.004028 |
| C | -6.450506 | -1.467503 | 0.723193 |
| C | 0.663480 | -0.986085 | -2.138739 |
| C | 0.418471 | 0.413977 | -2.417538 |
| C | 0.782578 | 1.473490 | -1.547010 |
| C | 1.262887 | -1.284479 | -0.898892 |
| C | -0.063786 | 2.617503 | -1.830885 |
| C | 0.861582 | 1.943285 | 0.782693 |
| C | -0.060280 | 3.019536 | 0.584041 |
| C | -0.560394 | 3.408294 | -0.706605 |
| C | -2.724155 | 3.957475 | 0.486502 |
| C | -2.187955 | 3.612987 | 1.765114 |
| C | -0.825246 | 3.195690 | 1.802836 |
| C | -4.434348 | 2.783177 | 2.422371 |
| C | -4.951781 | 3.036196 | 1.116639 |
| C | -4.089008 | 3.663410 | 0.163887 |
| C | -3.069908 | 3.073460 | 2.745022 |
| C | -2.902954 | -3.913209 | -1.311952 |
| C | -2.035398 | -3.380177 | -2.299732 |
| C | -0.659986 | -3.086896 | -1.975545 |
| C | -0.160645 | -3.321170 | -0.668871 |
| C | -1.010531 | -3.959563 | 0.284229 |
| C | -2.371106 | -4.265431 | -0.033652 |
| C | -0.266309 | -1.913253 | -2.697657 |
| C | 0.821502 | -2.409812 | -0.169695 |
| C | -3.158665 | -4.135163 | 1.168985 |
| C | -4.269386 | -3.468315 | -1.338246 |
| C | -5.083907 | -3.366333 | -0.157075 |
| C | -4.492892 | -3.631509 | 1.132712 |
| C | -2.613414 | 2.079961 | 3.690244 |
| C | -3.712606 | 1.182575 | 3.956415 |
| C | -6.011566 | 1.821544 | -0.788446 |
| C | -6.432629 | 0.454186 | -0.913382 |
| C | 1.383262 | -0.759751 | 1.378962 |
| C | 0.881151 | -2.084369 | 1.238506 |
| C | -1.388982 | -1.484310 | -3.492113 |
| C | -2.485548 | -2.385976 | -3.238169 |
| C | -3.485568 | -0.201007 | 4.201748 |
| C | -4.454611 | -1.143008 | 3.745521 |
| C | -0.000582 | -2.694879 | 2.199906 |
| C | -4.166123 | 3.348951 | -1.238733 |
| C | -1.638478 | -0.109806 | -3.740232 |
| C | 0.922280 | 0.059497 | 2.447533 |
| C | -4.940599 | -2.829055 | 2.219993 |
| C | -4.070154 | -2.463061 | 3.299462 |
| C | -2.707857 | -2.880033 | 3.277346 |
| C | -2.278897 | -3.747185 | 2.233851 |
| C | -0.945040 | -3.630424 | 1.684847 |
| C | -1.275382 | 1.616558 | 3.665462 |
| C | 0.661371 | 1.435738 | 2.092217 |
| C | -0.380305 | 2.217367 | 2.730948 |
| C | -1.008589 | 0.238650 | 4.030279 |
| C | -2.118374 | -0.649719 | 4.244890 |
| C | -1.725858 | -1.969326 | 3.824385 |
| C | -0.349910 | -1.917431 | 3.371681 |
| C | 0.113944 | -0.530890 | 3.504980 |
| C | -6.105635 | -2.353627 | -0.380321 |
| C | -5.861664 | -1.799714 | -1.714360 |
| C | -4.731475 | -2.498809 | -2.286267 |
| C | -3.823852 | -1.907166 | -3.236521 |
| C | -5.990719 | -0.383728 | -1.986884 |
| C | -1.931453 | 3.827942 | -0.721427 |
| C | -2.834782 | 3.439351 | -1.789664 |
| C | -2.397715 | 2.587382 | -2.856837 |
| C | -0.680023 | 0.841166 | -3.232735 |
| C | -0.996584 | 2.209473 | -2.889717 |
| C | -3.357999 | 1.655726 | -3.371842 |
| C | -5.123447 | 0.204830 | -2.958053 |
| C | -4.070866 | -0.549215 | -3.598320 |
| C | -2.983379 | 0.342763 | -3.853608 |
| N | -2.505104 | -0.162117 | 0.213837 |
| Sc | -1.316176 | -0.591395 | 1.771622 |
| Sc | -1.617662 | 1.318728 | -0.869883 |
| Sc | -4.280005 | -1.019880 | -0.172516 |
| C | -4.682638 | 1.569421 | -2.825132 |
| C | -5.093976 | 2.387801 | -1.727785 |
| C | 3.098283 | 1.965686 | -0.517265 |
| H | 3.555151 | 1.966183 | 0.483042 |
| C | 1.915160 | -0.271132 | 0.038784 |
| C | 1.673799 | 1.302630 | -0.316089 |
| C | 3.911691 | 1.012149 | -1.415527 |
| H | 3.424198 | 0.896684 | -2.386648 |
| H | 4.915310 | 1.411696 | -1.586556 |
| Si | 3.931397 | -0.566070 | -0.353190 |
| C | 4.128653 | -2.317230 | -1.084637 |
| C | 4.272788 | -3.418883 | -0.196013 |
| C | 4.155914 | -2.591704 | -2.476177 |
| C | 4.423142 | -4.713870 | -0.699208 |
| C | 4.317174 | -3.907797 | -2.932746 |
| C | 4.450021 | -4.996530 | -2.069452 |
| H | 4.521314 | -5.526383 | 0.016089 |
| H | 4.331980 | -4.066964 | -4.005333 |
| C | 5.399877 | -0.253798 | 0.863166 |
| C | 6.697947 | -0.364103 | 0.275620 |
| C | 5.347530 | 0.118126 | 2.228061 |
| C | 7.840937 | -0.104609 | 1.038778 |
| C | 6.523467 | 0.363975 | 2.952879 |
| C | 7.793434 | 0.260662 | 2.387538 |
| H | 8.804964 | -0.198458 | 0.545662 |
| H | 6.418420 | 0.646604 | 3.994638 |
| C | 4.294097 | -3.270447 | 1.314013 |
| H | 5.255128 | -2.881737 | 1.669032 |
| H | 3.517092 | -2.594958 | 1.685101 |
| H | 4.128731 | -4.240023 | 1.794491 |
| C | 4.017740 | -1.522462 | -3.541587 |
| H | 3.028694 | -1.051502 | -3.518551 |
| H | 4.763946 | -0.727749 | -3.436976 |
| H | 4.144457 | -1.958112 | -4.537204 |
| C | 4.053210 | 0.262571 | 2.991498 |
| H | 3.389270 | 1.009714 | 2.546336 |
| H | 3.500340 | -0.680848 | 3.039092 |
| H | 4.242666 | 0.577820 | 4.022241 |
| C | 6.949221 | -0.781197 | -1.162777 |
| H | 6.779185 | -1.852636 | -1.310914 |
| H | 6.312463 | -0.255725 | -1.880305 |
| H | 7.986067 | -0.568509 | -1.440735 |
| C | 4.617116 | -6.445027 | -2.560568 |
| C | 5.959683 | -7.011229 | -2.038939 |
| H | 6.007571 | -7.005084 | -0.944992 |
| H | 6.091240 | -8.047641 | -2.373137 |
| H | 6.805311 | -6.423558 | -2.414614 |
| C | 4.616635 | -6.547975 | -4.097654 |
| H | 3.677914 | -6.184353 | -4.530761 |
| H | 5.442289 | -5.983164 | -4.545635 |
| H | 4.733479 | -7.595869 | -4.396223 |
| C | 3.451855 | -7.307531 | -2.018907 |
| H | 3.423932 | -7.314593 | -0.924329 |
| H | 2.486344 | -6.931404 | -2.375718 |
| H | 3.558764 | -8.345561 | -2.356801 |
| C | 9.091653 | 0.525992 | 3.169026 |
| C | 9.962108 | -0.753673 | 3.164694 |
| H | 10.223582 | -1.065267 | 2.148020 |
| H | 10.896715 | -0.580035 | 3.711771 |
| H | 9.436684 | -1.586871 | 3.645403 |
| C | 9.872135 | 1.678624 | 2.493139 |
| H | 10.132515 | 1.442089 | 1.456180 |
| H | 9.281647 | 2.601963 | 2.487523 |
| H | 10.805369 | 1.875154 | 3.035028 |
| C | 8.823778 | 0.920939 | 4.633845 |
| H | 8.231532 | 1.840234 | 4.706816 |
| H | 8.297767 | 0.130029 | 5.180624 |
| H | 9.775084 | 1.100294 | 5.147344 |
| C | 3.078683 | 3.417248 | -0.966776 |
| C | 3.080254 | 4.442347 | -0.009040 |
| C | 3.074431 | 3.798775 | -2.312840 |
| C | 3.062675 | 5.783356 | -0.382064 |
| H | 3.099576 | 4.185482 | 1.047747 |
| C | 3.058570 | 5.145112 | -2.685614 |
| H | 3.088789 | 3.043088 | -3.093022 |
| C | 3.048721 | 6.172367 | -1.732419 |
| H | 3.066384 | 6.538571 | 0.399155 |
| H | 3.057091 | 5.382464 | -3.743833 |
| C | 3.036007 | 7.665560 | -2.104800 |
| C | 4.305431 | 8.346780 | -1.539103 |
| H | 5.212185 | 7.898337 | -1.961257 |
| H | 4.307482 | 9.415496 | -1.786355 |
| H | 4.364727 | 8.256861 | -0.449297 |
| C | 1.780947 | 8.336959 | -1.497094 |
| H | 0.864263 | 7.882729 | -1.890577 |
| H | 1.756815 | 8.245490 | -0.406180 |
| H | 1.763806 | 9.405905 | -1.742547 |
| C | 3.009476 | 7.889245 | -3.628698 |
| H | 3.894133 | 7.467023 | -4.119118 |
| H | 2.118359 | 7.448438 | -4.090113 |
| H | 2.995206 | 8.963604 | -3.844240 |
